# Supplementary material for: Identification of Genes Required for Alternative Oxidase Production in the Neurospora crassa Gene Knockout Library
Source: PubMed Central journal article supplement (PMC3484665; doi:10.1534/g3.112.004218), 2012-11-01
Supplement: supp_2.11.1345_TableS1.pdf [file supp_2.11.1345_TableS1.pdf]

**Table S1** Homologues of NCU09803.5 in the *N. crassa*, *S. cerevisiae*, and *S. pombe* genomes

| Protein                          | E value in BLAST<br>to NCU09803 |
|----------------------------------|---------------------------------|
| <i>S. cerevisiae</i> GRX3        | 1.1e-49                         |
| <i>S. cerevisiae</i> GRX4        | 2.0e-48                         |
| <i>S. cerevisiae</i> GRX5        | 1.9e-22                         |
| <i>N. crassa</i> NCU04098 (GRX5) | 7.3e-21                         |
| <i>S. pombe</i> GRX4             | 2.3e-47                         |
| <i>S. pombe</i> GRX5             | 2.1e-21                         |
